# Supplementary material
Source: PubMed Central journal article supplement (PMC6461215)
Supplement: NIHMS985896-supplement-Sup_Figures.pdf [file NIHMS985896-supplement-Sup_Figures.pdf]

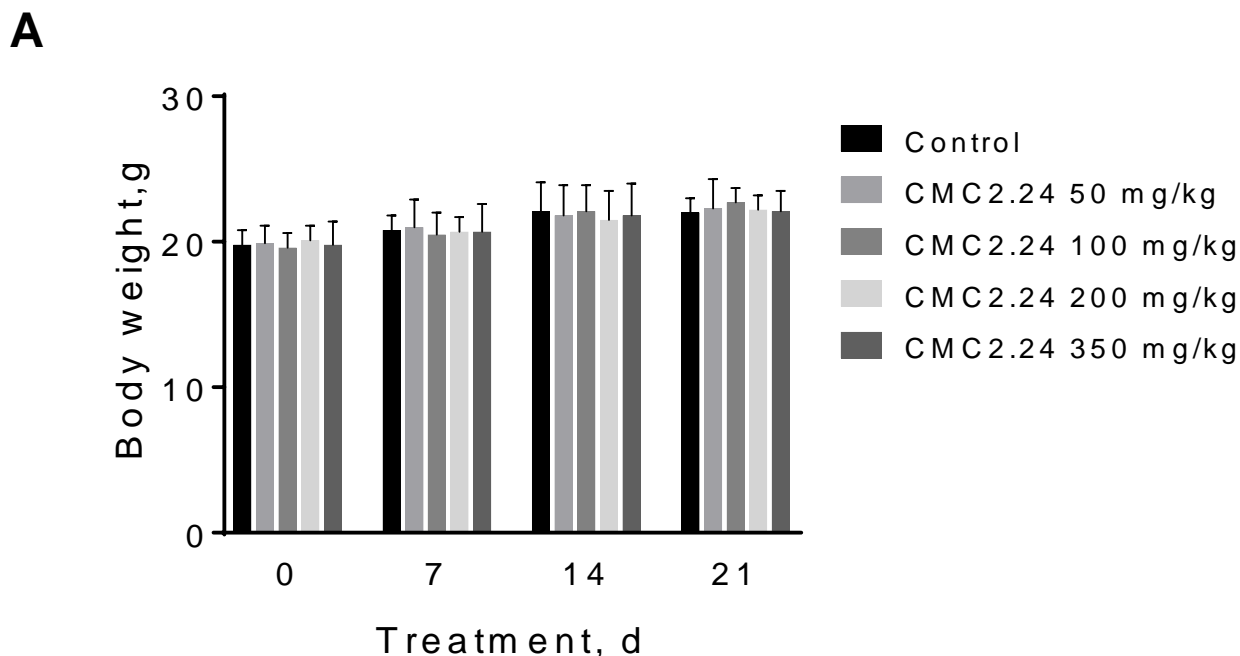

**B**

|                 | Alanine Transaminase U/L | Albumin g/dL | Alkaline Phosphatase U/L | Aspartate Transaminase U/L | Blood Urea Nitrogen mg/dL | Creatinine mg/dL | Total Bilirubin mg/dL | Total Protein g/dL |
|-----------------|--------------------------|--------------|--------------------------|----------------------------|---------------------------|------------------|-----------------------|--------------------|
| Reference Range | 0-403                    | 2.9-4.0      | 49-172                   | 0-552                      | 15.2-34.7                 | 0.0-0.3          | 0.0-0.2               | 4.7-6.1            |
| Control         | 52.9 ± 28.9              | 3.44 ± 0.14  | 68.3 ± 22.6              | 83.9 ± 53.7                | 27.3 ± 4.5                | 0.15 ± 0.03      | 0.08 ± 0.05           | 5.7 ± 0.1          |
| CMC2.24         | 70.9 ± 55.5              | 3.54 ± 0.17  | 81.1 ± 17.0              | 110.3 ± 55.8               | 28.2 ± 4.1                | 0.18 ± 0.04      | 0.05 ± 0.02           | 5.6 ± 0.3          |

**Supplemental figure 1: A:** Body weight progression during the study for vehicle control and CMC2.24 treated mice during the 3 week treatment period. The differences in body weight between the groups are not statistically significant. **B:** Serum levels of multiple biochemical enzymes and markers of liver and kidney function for control and CMC2.24 350 mg/kg at the end of the 3-week treatment period.

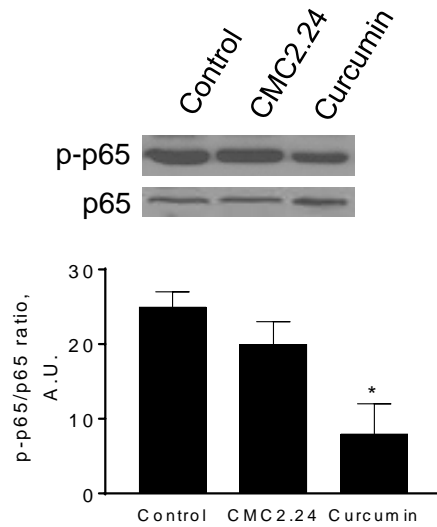

**Supplemental figure 2: Curcumin, but not CMC2.24, inhibits NF- $\kappa$ B activation in pancreatic cancer cells.** Immunoblots of p-p65 and p65 in MIA PaCa-2 cells treated with CMC2.24 or curcumin at  $1.5 \times IC_{50}$  for 4 h. Results we quantified as the ration between p-p65/p65; \* $p < 0.05$  versus control.
